# Supplementary material
Source: Springer Nature journal article supplement (https://www.springermedizin.de/resource/supplementary/13019_2010_368_MOESM3_ESM.pdf/9638634)

### Central venous pressure

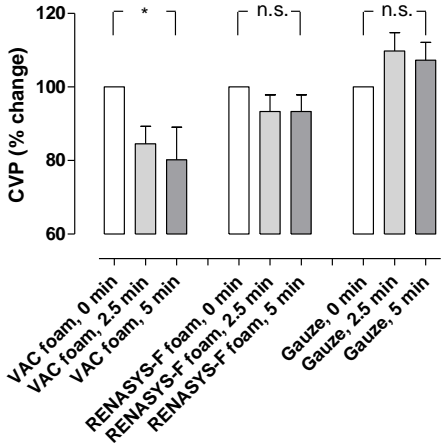

### Left atrial pressure

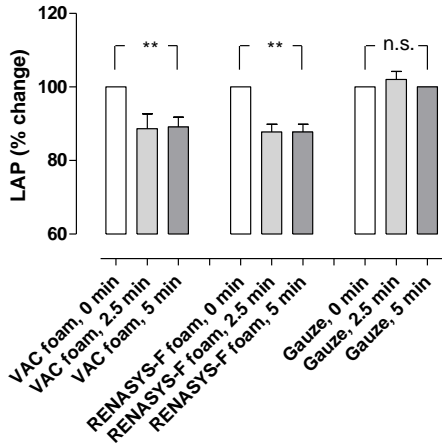

Supplement: MOESM3 [file 9638634]
